# Supplementary material for: Functional screening of mammalian mechanosensitive genes using Drosophila RNAi library– Smarcd3/Bap60 is a mechanosensitive pro-inflammatory gene
Source: PubMed Central journal article supplement (PMC5098218; doi:10.1038/srep36461), 2016-11-07
Supplement: srep36461-s1.pdf [file srep36461-s1.pdf]

## SUPPLEMENTARY INFORMATION

**Functional screening of mammalian mechanosensitive genes using *Drosophila* RNAi library– *Smarcd3/Bap60* is a mechanosensitive pro-inflammatory gene.**

Sandeep Kumar<sup>1\*</sup>, In-hwan Jang<sup>1\*</sup>, Chan Woo Kim<sup>1</sup>, Dong-Won Kang<sup>1</sup>, Won Jae Lee<sup>2</sup>, and Hanjoong Jo<sup>1,3</sup> ¶

<sup>1</sup>Wallace H. Coulter Department of Biomedical Engineering, Georgia Institute of Technology and Emory University, Atlanta, GA, USA, <sup>2</sup>National Creative Research Initiative Center for Hologenomics, and School of Biological Sciences, Seoul National University, Seoul 151-742, South Korea, and <sup>3</sup>Division of Cardiology, Department of Medicine, Emory University, Atlanta, GA, USA.

## Supplementary Table 1

### List of RNAi fly lines showing Drosophila transformant ID and CG numbers with corresponding mouse gene IDs

| S. No.<br>(In this study) | Transformant ID | CG Number     | Mouse Gene     | Illumina Gene_ID    | lethality (c564> RNAi) |
|---------------------------|-----------------|---------------|----------------|---------------------|------------------------|
| 1                         | 100259          | CG8933        | Pbx1           | ILMN_2913089        |                        |
| 2                         | 100269          | CG3724        | Pgd            | ILMN_3052632        |                        |
| 3                         | 100688          | CG32190       | Nucb1          |                     |                        |
| 4                         | 100728          | CG3209        | Agpat6         | ILMN_2495363        |                        |
| 5                         | 101340          | CG1938        | Dync1li2       | ILMN_3120652        |                        |
| 6                         | 101403          | CG1265        | Pqlc3          | ILMN_1238215        |                        |
| 7                         | 101960          | CG7142        | klk10-3        | ILMN_2507890        |                        |
| 8                         | 102014          | CG14808       | Sgcd           | ILMN_2633062        |                        |
| 9                         | 103038          | CG9796        | Ifi30          | ILMN_2432550        |                        |
| 10                        | 103249          | CG15101       | Ephx1          | ILMN_1219712        |                        |
| 11                        | 103485          | CG8946        | Sgpl1          | ILMN_2756665        |                        |
| <b>12</b>                 | <b>103541</b>   | <b>CG1100</b> | <b>Psmid12</b> | <b>ILMN_1225988</b> |                        |
| 13                        | 103581          | CG31992       | Tnrc6c         | ILMN_2935386        |                        |
| 14                        | 103631          | CG9325        | Add1           | ILMN_2674367        |                        |
| <b>15</b>                 | <b>103634</b>   | <b>CG4303</b> | <b>Smarcd3</b> | <b>ILMN_2559943</b> |                        |
| 16                        | 103911          | CG2875        | Noc4l          | ILMN_2761918        |                        |
| 17                        | 104386          | CG11121       | Six2           | ILMN_3013874        |                        |
| 18                        | 104575          | CG1542        | Ebna1bp2       | ILMN_1258788        | lethal                 |
| 19                        | 105111          | CG11059       | Clstn1         | ILMN_2718801        |                        |
| 20                        | 105149          | CG10565       | Dnajc2         | ILMN_1257077        |                        |
| 21                        | 105161          | CG8362        | Nme7           | ILMN_2685023        |                        |
| 22                        | 105269          | CG16996       | klk10-2        | ILMN_2507890        |                        |
| 23                        | 105361          | CG9096        | Ccnd2          | ILMN_3144575        |                        |
| 24                        | 105383          | CG6721        | Rasa3          | ILMN_1228031        |                        |
| 25                        | 105403          | CG9135        | Rcc2           | ILMN_2513570        |                        |
| 26                        | 105408          | CG4003        | Ruvbl1         | ILMN_3150811        | lethal                 |
| 27                        | 105492          | CG15669       | Ndr3           | ILMN_2669404        |                        |
| 28                        | 105604          | CG3943        | Serhl          | ILMN_1248397        |                        |
| 29                        | 105663          | CG4755        | Arhgap17       | ILMN_2474515        |                        |
| 30                        | 105853          | CG9224        | Chrd           | ILMN_1248604        |                        |
| 31                        | 106120          | CG4233        | Got2           | ILMN_2599008        |                        |
| 32                        | 106122          | CG31999       | Fbln2          | ILMN_2993109        |                        |
| 33                        | 106129          | CG5033        | Bop1           | ILMN_2614380        |                        |

|    |        |         |               |              |        |
|----|--------|---------|---------------|--------------|--------|
| 34 | 106236 | CG8542  | Hspa9         | ILMN_2727687 | lethal |
| 35 | 106470 | CG2789  | Tspo          | ILMN_1254513 |        |
| 36 | 106642 | CG9375  | Kras          | ILMN_1217606 |        |
| 37 | 106761 | CG9195  | Scamp1        | ILMN_2622354 |        |
| 38 | 106774 | CG5408  | Trib2         | ILMN_1215085 |        |
| 39 | 106924 | CG1837  | Txndc5        | ILMN_2678355 |        |
| 40 | 107131 | CG10465 | Kctd10        | ILMN_1240256 |        |
| 41 | 107176 | CG5020  | Clip1         | ILMN_2833781 |        |
| 42 | 107181 | CG5497  | Mrps28        | ILMN_3115796 |        |
| 43 | 107190 | CG8841  | C630004H02Rik | ILMN_2767918 |        |
| 44 | 107304 | CG3780  | Sf3b4         | ILMN_1243249 | lethal |
| 45 | 107314 | CG3924  | Ldb2          | ILMN_2891646 |        |
| 46 | 107327 | CG11711 | 2700078K21Rik | ILMN_2547840 |        |
| 47 | 107590 | CG5336  | Elmo1         | ILMN_2624451 |        |
| 48 | 107995 | CG2219  | Arl4a         | ILMN_2666487 |        |
| 49 | 108069 | CG6218  | Nagk          | ILMN_2920849 |        |
| 50 | 108082 | CG5319  | Btbd3         | ILMN_1226606 |        |
| 51 | 108442 | CG10724 | Wdr1          | ILMN_2627179 |        |
| 52 | 108449 | CG14100 | Rnmtl1        | ILMN_2618408 |        |
| 53 | 108542 | CG32758 | Snx27         | ILMN_1217928 |        |
| 54 | 108597 | CG4849  | Eftud2        | ILMN_2757019 | lethal |
| 55 | 108658 | CG3723  | Dnahc17       | ILMN_1249888 |        |
| 56 | 108723 | CG10728 | Wdr77         | ILMN_1242787 |        |
| 57 | 108773 | CG16997 | Klk10-1       | ILMN_2507890 |        |
| 58 | 108840 | CG14788 | Lsg1          | ILMN_2633897 |        |
| 59 | 108850 | CG3730  | Prmt5         | ILMN_2706853 |        |
| 60 | 109421 | CG6136  | Cutc          | ILMN_2664224 |        |
| 61 | 109454 | CG4637  | dhh           |              |        |
| 62 | 109603 | CG5355  | Prep          | ILMN_2759079 |        |
| 63 | 109738 | CG6891  | Cotl1         | ILMN_2598103 |        |
| 64 | 109762 | CG2173  | Ddx27         | ILMN_3137804 | lethal |
| 65 | 110321 | CG10480 | Rcc1          | ILMN_1217742 |        |
| 66 | 110400 | CG8314  | Zdhhc3        | ILMN_2607880 |        |
| 67 | 110454 | CG1333  | Ero1lb        | ILMN_2715558 |        |
| 68 | 110682 | CG9155  | Myo1c         | ILMN_2697760 |        |
| 69 | 110691 | CG4684  | Fchsd2        | ILMN_1248139 |        |
| 70 | 12762  | CG6854  | Ctps          | ILMN_2788593 |        |
| 71 | 18873  | CG10236 | Lama5         | ILMN_1221817 |        |
| 72 | 22125  | CG5433  | Klc1          | ILMN_2834370 |        |
| 73 | 23425  | CG5708  | Lmo4          | ILMN_1224866 |        |
| 74 | 25909  | CG31917 | Znhit1        | ILMN_1215879 |        |
| 75 | 29096  | CG9296  | Pde6d         | ILMN_2504268 |        |
| 76 | 3449   | CG31937 | Dhrs7         | ILMN_1236290 |        |

|           |              |               |               |                     |
|-----------|--------------|---------------|---------------|---------------------|
| 77        | 34621        | CG3454        | Hdc           | ILMN_2672190        |
| 78        | 37816        | CG10692       | Mt2           |                     |
| 79        | 37823        | CG10388       | Hoxa7         | ILMN_2759563        |
| <b>80</b> | <b>39562</b> | <b>CG4583</b> | <b>ERN1</b>   | <b>ILMN_2878071</b> |
| 81        | 45300        | CG5669        | Sp4           | ILMN_3089584        |
| 82        | 6446         | CG8804        | Ppap2a        | ILMN_2743013        |
| 83        | 7577         | CG11576       | 2310046K01Rik | ILMN_2669441        |
| 84        | 8209         | CG16868       | Cachd1        | ILMN_2699531        |

## Supplementary Table 2

### List and sequences of qPCR primers for mRNA expression (Drosophila)

| Primer        | Sequence                       |
|---------------|--------------------------------|
| Drosomycin_Fw | 5'-GCAGATCAAGTACTTGTTGCCCC-3'  |
| Drosomycin_Rv | 5'-CTTCGCACCAGCACTTCAGACTGG-3' |
| Diptericin Fw | 5'-GGCTTATCCGATGCCCGACG-3'     |
| Diptericin Rv | 5'-TCTGTAGGTGTAGGTGCTTCC-3'    |
| Rp49_Fw       | 5'-AGATCGTGAAGAAGCGCACCAAG-3'  |
| Rp49_Rv       | 5'-CACCAGGAAGTCTTGAATCCGG-3'   |

### Supplementary Table 3

#### List and sequences of qPCR primers for mRNA expression (Mouse/Human)

| Primer       | Sequence                       |
|--------------|--------------------------------|
| m KLF2-Fw    | 5'-CCAACTGCGGCAAGACCTAC-3'     |
| m KLF2-Rv    | 5'-AGTCGACCCAGGCTACATGTG-3'    |
| m smarcd3_Fw | 5'-CATGGAATTCGAACCCAAACA-3'    |
| m smarcd3_Rv | 5'-TTTCGGAGCAGGAAAGCCCTGG-3'   |
| m psmd12_Fw  | 5'- ACATGGTGTCCACGTCCCGCA -3'  |
| m psmd12_Rv  | 5'-TCGCAGCTTGACTGGCAGGTCT-3'   |
| m ERN1_Fw    | 5'-TTGAGGAATTACTGGCTTCTCAT-3'  |
| m ERN1_Rv    | 5'-TCCAGCATCTTGGTGGATG-3'      |
| hm 18s_Fw    | 5'-AGGAATTGACGGAAGGGCACCA-3'   |
| hm 18s_Rv    | 5'-GTGCAGCCCCGGACATCTAAG-3'    |
| h KLF2-Fw    | 5'-AGACCTACACCAAGAGTTCGCATC-3' |
| h KLF2-Rv    | 5'-CATGTGCCGTTTCATGTGCAGC-3'   |
| h CXCL8_Fw   | 5'-CATGACTTCCAAGCTGGCCG-3'     |
| h CXCL8_Rv   | 5'-TTTATGAATTCTCAGCCCTC-3'     |
| h Smarcd3_Fw | 5'-GGAGGAAGATGGCTGACAAA-3'     |
| h Smarcd3_Rv | 5'-GCCAAGAGGTCCATGTAAGC-3'     |
| h VCAM1_Fw   | 5'-CATGGAATTCGAACCCAAACA-3'    |
| h VCAM1_Rv   | 5'-TTTCGGAGCAGGAAAGCCCTGG-3'   |

Supplementary Table 4

**Visual Scoring of GFP fluorescence Intensity on a scale of 0 (least) to 5(most) at basal and post Gram-positive bacterial infection in control flies and RNAi fly lines with corresponding mouse gene IDs.**

| #  | CG Number | <i>RNAi</i><br>Fly Line | Whether<br>embryonic<br>Lethal? | Representative<br>Image of the fly<br>under basal<br>(Non-infection)<br>condition    | <u>Visual GFP<br/>Scoring</u><br><br>Basal<br>(Non-<br>infection)<br>condition | Representative<br>Image of the fly<br>(Post Gram-<br>positive<br>infection<br>condition) | <u>Visual GFP<br/>Scoring</u><br><br>Post Gram-<br>positive<br>infection |
|----|-----------|-------------------------|---------------------------------|--------------------------------------------------------------------------------------|--------------------------------------------------------------------------------|------------------------------------------------------------------------------------------|--------------------------------------------------------------------------|
| I  |           | C564                    |                                 |    | 0 ±0                                                                           |       | 5 ±0                                                                     |
| II |           | Dif                     |                                 |  | 0.3 ±0.3                                                                       |     | 0.4 ±0.24                                                                |

|    |        |       |  |                                                                                     |               |                                                                                      |                |
|----|--------|-------|--|-------------------------------------------------------------------------------------|---------------|--------------------------------------------------------------------------------------|----------------|
| II |        | Myd88 |  |    | $0 \pm 0$     |    | $0.4 \pm 0.24$ |
|    |        |       |  |                                                                                     |               |                                                                                      |                |
| 1  | CG8933 | Pbx1  |  |   | $0 \pm 0$     |   | $5 \pm 0$      |
| 2  | CG3724 | Pgd   |  |  | $1.2 \pm 0.5$ |  | $5 \pm 0$      |



|   |         |          |  |                                                                                     |               |                                                                                      |                |
|---|---------|----------|--|-------------------------------------------------------------------------------------|---------------|--------------------------------------------------------------------------------------|----------------|
| 3 | CG32190 | Nucb1    |  |    | $0.3 \pm 0.1$ |    | $5 \pm 0$      |
| 4 | CG3209  | Agpat6   |  |   | $0.3 \pm 0.3$ |   | $4.9 \pm 0.13$ |
| 5 | CG1938  | Dync1li2 |  |  | $0.3 \pm 0.3$ |  | $5 \pm 0$      |

|   |         |         |  |                                                                                     |               |                                                                                      |           |
|---|---------|---------|--|-------------------------------------------------------------------------------------|---------------|--------------------------------------------------------------------------------------|-----------|
| 6 | CG1265  | Pqlc3   |  |    | $0 \pm 0$     |    | $5 \pm 0$ |
| 7 | CG7142  | klk10-3 |  |   | $0.8 \pm 0.4$ |   | $5 \pm 0$ |
| 8 | CG14808 | Sgcd    |  |  | $0 \pm 0$     |  | $5 \pm 0$ |

|    |         |       |  |                                                                                     |               |                                                                                      |                |
|----|---------|-------|--|-------------------------------------------------------------------------------------|---------------|--------------------------------------------------------------------------------------|----------------|
| 9  | CG9796  | lfi30 |  |    | $0.4 \pm 0.4$ |    | $4.9 \pm 0.13$ |
| 10 | CG15101 | Ephx1 |  |   | $1.4 \pm 0.9$ |   | $5 \pm 0$      |
| 11 | CG8946  | Sgpl1 |  |  | $1 \pm 0.4$   |  | $5 \pm 0$      |

|    |         |        |  |                                                                                     |               |                                                                                      |                |
|----|---------|--------|--|-------------------------------------------------------------------------------------|---------------|--------------------------------------------------------------------------------------|----------------|
| 12 | CG1100  | Psmc12 |  |    | $1.4 \pm 0.9$ |    | $3.7 \pm 0.56$ |
| 13 | CG31992 | Tnrc6c |  |   | $0.3 \pm 0.3$ |   | $4.5 \pm 0.21$ |
| 14 | CG9325  | Add1   |  |  | $0.3 \pm 0.3$ |  | $4.8 \pm 0.25$ |

|    |         |          |        |                                                                                     |               |                                                                                      |           |
|----|---------|----------|--------|-------------------------------------------------------------------------------------|---------------|--------------------------------------------------------------------------------------|-----------|
| 15 | CG4303  | Smarcd3  |        | 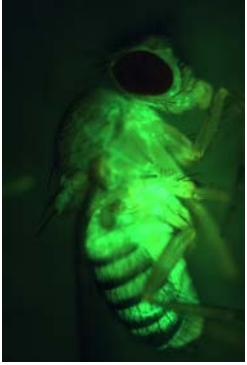   | $3.5 \pm 1.2$ |    | $5 \pm 0$ |
| 16 | CG2875  | Noc4l    |        |   | $0.2 \pm 0.1$ |   | $5 \pm 0$ |
| 17 | CG11121 | Six2     |        |  | $0.2 \pm 0.1$ |  | $5 \pm 0$ |
| 18 | CG1542  | Ebna1bp2 | lethal |                                                                                     | NA            |                                                                                      | NA        |

|    |         |        |  |                                                                                     |               |                                                                                      |           |
|----|---------|--------|--|-------------------------------------------------------------------------------------|---------------|--------------------------------------------------------------------------------------|-----------|
| 19 | CG11059 | Clstn1 |  |    | $0.5 \pm 0.2$ |    | $5 \pm 0$ |
| 20 | CG10565 | Dnajc2 |  |   | $0.8 \pm 0.6$ |   | $5 \pm 0$ |
| 21 | CG8362  | Nme7   |  |  | $0.8 \pm 0.6$ |  | $5 \pm 0$ |

|    |         |         |  |                                                                                     |               |                                                                                      |                |
|----|---------|---------|--|-------------------------------------------------------------------------------------|---------------|--------------------------------------------------------------------------------------|----------------|
| 22 | CG16996 | klk10-2 |  |    | $1.2 \pm 0.6$ |    | $5 \pm 0$      |
| 23 | CG9096  | Ccnd2   |  |   | $0.7 \pm 0.6$ |   | $5 \pm 0$      |
| 24 | CG6721  | Rasa3   |  |  | $0 \pm 0$     |  | $3.9 \pm 0.43$ |

|    |         |        |        |                                                                                     |               |                                                                                      |                |
|----|---------|--------|--------|-------------------------------------------------------------------------------------|---------------|--------------------------------------------------------------------------------------|----------------|
| 25 | CG9135  | Rcc2   |        |    | $0.4 \pm 0.4$ |    | $4.5 \pm 0.36$ |
| 26 | CG4003  | Ruvbl1 | lethal |                                                                                     | NA            |                                                                                      | NA             |
| 27 | CG15669 | Ndr3   |        |   | $0.3 \pm 0.3$ |   | $5 \pm 0$      |
| 28 | CG3943  | Serhl  |        |  | $0.4 \pm 0.4$ |  | $5 \pm 0$      |



|    |        |          |  |                                                                                     |               |                                                                                      |                |
|----|--------|----------|--|-------------------------------------------------------------------------------------|---------------|--------------------------------------------------------------------------------------|----------------|
| 29 | CG4755 | Arhgap17 |  |    | $0.3 \pm 0.3$ |    | $5 \pm 0$      |
| 30 | CG9224 | Chrd     |  |   | $0.3 \pm 0.3$ |   | $4.4 \pm 0.24$ |
| 31 | CG4233 | Got2     |  |  | $0.4 \pm 0.4$ |  | $5 \pm 0$      |

|    |         |       |        |                                                                                     |               |                                                                                      |                |
|----|---------|-------|--------|-------------------------------------------------------------------------------------|---------------|--------------------------------------------------------------------------------------|----------------|
| 32 | CG31999 | Fbln2 |        |    | $0.2 \pm 0.1$ |    | $4.8 \pm 0.25$ |
| 33 | CG5033  | Bop1  |        |   | $0.2 \pm 0.1$ |   | $5 \pm 0$      |
| 34 | CG8542  | Hspa9 | lethal |                                                                                     | NA            |                                                                                      | NA             |
| 35 | CG2789  | Tspo  |        |  | $1 \pm 0.4$   |  | $5 \pm 0$      |

|    |        |        |  |                                                                                     |               |                                                                                      |                |
|----|--------|--------|--|-------------------------------------------------------------------------------------|---------------|--------------------------------------------------------------------------------------|----------------|
| 36 | CG9375 | Kras   |  |    | $0.4 \pm 0.4$ |    | $5 \pm 0$      |
| 37 | CG9195 | Scamp1 |  |   | $0.3 \pm 0.3$ |   | $5 \pm 0$      |
| 38 | CG5408 | Trib2  |  |  | $0.8 \pm 0.6$ |  | $4.9 \pm 0.13$ |

|    |         |        |  |                                                                                     |               |                                                                                      |                |
|----|---------|--------|--|-------------------------------------------------------------------------------------|---------------|--------------------------------------------------------------------------------------|----------------|
| 39 | CG1837  | Txndc5 |  |    | $0.5 \pm 0.5$ |    | $5 \pm 0$      |
| 40 | CG10465 | Kctd10 |  |   | $0.7 \pm 0.5$ |   | $4.8 \pm 0.25$ |
| 41 | CG5020  | Clip1  |  |  | $0.2 \pm 0.1$ |  | $4.4 \pm 0.24$ |

|    |        |               |        |                                                                                     |               |                                                                                      |                |
|----|--------|---------------|--------|-------------------------------------------------------------------------------------|---------------|--------------------------------------------------------------------------------------|----------------|
| 42 | CG5497 | Mrps28        |        |    | $0.8 \pm 0.3$ |    | $4.5 \pm 0.29$ |
| 43 | CG8841 | C630004H02Rik |        |   | $0.5 \pm 0.3$ |   | $4.8 \pm 0.25$ |
| 44 | CG3780 | Sf3b4         | lethal |                                                                                     | NA            |                                                                                      | NA             |
| 45 | CG3924 | Ldb2          |        |  | $0.4 \pm 0.4$ |  | $4.9 \pm 0.13$ |

|    |         |               |  |                                                                                     |               |                                                                                      |                |
|----|---------|---------------|--|-------------------------------------------------------------------------------------|---------------|--------------------------------------------------------------------------------------|----------------|
| 46 | CG11711 | 2700078K21Rik |  |    | $0 \pm 0$     |    | $4.8 \pm 0.25$ |
| 47 | CG5336  | Elmo1         |  |   | $0.2 \pm 0.1$ |   | $4.2 \pm 0.52$ |
| 48 | CG2219  | Arl4a         |  |  | $0.4 \pm 0.4$ |  | $4.8 \pm 0.25$ |

|    |         |       |  |                                                                                     |               |                                                                                      |                |
|----|---------|-------|--|-------------------------------------------------------------------------------------|---------------|--------------------------------------------------------------------------------------|----------------|
| 49 | CG6218  | Nagk  |  |    | $0.2 \pm 0.1$ |    | $4.8 \pm 0.25$ |
| 50 | CG5319  | Btbd3 |  |   | $0 \pm 0$     |   | $4.8 \pm 0.25$ |
| 51 | CG10724 | Wdr1  |  |  | $0.4 \pm 0.4$ |  | $4.2 \pm 0.43$ |

|    |         |         |        |                                                                                     |               |                                                                                      |                |
|----|---------|---------|--------|-------------------------------------------------------------------------------------|---------------|--------------------------------------------------------------------------------------|----------------|
| 52 | CG14100 | Rnmtl1  |        |    | $0.2 \pm 0.1$ |    | $4.8 \pm 0.25$ |
| 53 | CG32758 | Snx27   |        |   | $0 \pm 0$     |   | $4.3 \pm 0.48$ |
| 54 | CG4849  | Eftud2  | lethal |                                                                                     | NA            |                                                                                      | NA             |
| 55 | CG3723  | Dnahc17 |        |  | $0.4 \pm 0.2$ |  | $4.8 \pm 0.25$ |



|    |         |         |  |                                                                                     |               |                                                                                      |                |
|----|---------|---------|--|-------------------------------------------------------------------------------------|---------------|--------------------------------------------------------------------------------------|----------------|
| 56 | CG10728 | Wdr77   |  |    | $0.3 \pm 0.1$ |    | $4.9 \pm 0.13$ |
| 57 | CG16997 | Klk10-1 |  |   | $0.4 \pm 0.2$ |   | $4.8 \pm 0.25$ |
| 58 | CG14788 | Lsg1    |  |  | $1.2 \pm 0.5$ |  | $4.8 \pm 0.25$ |

|    |        |       |  |                                                                                     |               |                                                                                      |                |
|----|--------|-------|--|-------------------------------------------------------------------------------------|---------------|--------------------------------------------------------------------------------------|----------------|
| 59 | CG3730 | Prmt5 |  |    | $0.7 \pm 0.5$ |    | $4.8 \pm 0.25$ |
| 60 | CG6136 | Cutc  |  |   | $0.2 \pm 0.1$ |   | $4.7 \pm 0.24$ |
| 61 | CG4637 | dhh   |  |  | $0.7 \pm 0.4$ |  | $5 \pm 0$      |

|    |         |       |        |                                                                                     |               |                                                                                      |                |
|----|---------|-------|--------|-------------------------------------------------------------------------------------|---------------|--------------------------------------------------------------------------------------|----------------|
| 62 | CG5355  | Prep  |        |    | $0.2 \pm 0.1$ |    | $5 \pm 0$      |
| 63 | CG6891  | Cot11 |        |   | $0 \pm 0$     |   | $5 \pm 0$      |
| 64 | CG2173  | Ddx27 | lethal |                                                                                     | NA            |                                                                                      | NA             |
| 65 | CG10480 | Rcc1  |        |  | $0.2 \pm 0.1$ |  | $4.5 \pm 0.29$ |

|    |        |        |  |                                                                                     |               |                                                                                      |                |
|----|--------|--------|--|-------------------------------------------------------------------------------------|---------------|--------------------------------------------------------------------------------------|----------------|
| 66 | CG8314 | Zdhhc3 |  |    | $0.2 \pm 0.1$ |    | $4.9 \pm 0.13$ |
| 67 | CG1333 | Ero1lb |  |   | $0 \pm 0$     |   | $5 \pm 0$      |
| 68 | CG9155 | Myo1c  |  |  | $0.5 \pm 0.3$ |  | $5 \pm 0$      |

|    |         |        |  |                                                                                     |               |                                                                                      |                |
|----|---------|--------|--|-------------------------------------------------------------------------------------|---------------|--------------------------------------------------------------------------------------|----------------|
| 69 | CG4684  | Fchsd2 |  |    | $0.3 \pm 0.3$ |    | $5 \pm 0$      |
| 70 | CG6854  | Ctps   |  |   | $0.7 \pm 0.4$ |   | $5 \pm 0$      |
| 71 | CG10236 | Lama5  |  |  | $0.4 \pm 0.4$ |  | $4.5 \pm 0.21$ |

|    |         |        |  |                                                                                     |               |                                                                                      |                |
|----|---------|--------|--|-------------------------------------------------------------------------------------|---------------|--------------------------------------------------------------------------------------|----------------|
| 72 | CG5433  | Klc1   |  |    | $0.2 \pm 0.1$ |    | $4.8 \pm 0.15$ |
| 73 | CG5708  | Lmo4   |  |   | $0.4 \pm 0.4$ |   | $4.9 \pm 0.13$ |
| 74 | CG31917 | Znhit1 |  |  | $1.5 \pm 0.5$ |  | $4.8 \pm 0.25$ |

|    |         |       |  |                                                                                     |               |                                                                                      |                |
|----|---------|-------|--|-------------------------------------------------------------------------------------|---------------|--------------------------------------------------------------------------------------|----------------|
| 75 | CG9296  | Pde6d |  |    | $0 \pm 0$     |    | $5 \pm 0$      |
| 76 | CG31937 | Dhrs7 |  |   | $0.2 \pm 0.1$ |   | $5 \pm 0$      |
| 77 | CG3454  | Hdc   |  |  | $1 \pm 0.7$   |  | $4.9 \pm 0.13$ |

|    |         |       |  |                                                                                     |               |                                                                                      |              |
|----|---------|-------|--|-------------------------------------------------------------------------------------|---------------|--------------------------------------------------------------------------------------|--------------|
| 78 | CG10692 | Mt2   |  |    | $1.2 \pm 0.7$ |    | $5 \pm 0$    |
| 79 | CG10388 | Hoxa7 |  |   | $0.4 \pm 0.2$ |   | $5 \pm 0$    |
| 80 | CG4583  | Ern1  |  |  | $1 \pm 0.7$   |  | $3 \pm 0.55$ |



|    |         |               |  |                                                                                     |               |                                                                                      |                |
|----|---------|---------------|--|-------------------------------------------------------------------------------------|---------------|--------------------------------------------------------------------------------------|----------------|
| 81 | CG5669  | Sp4           |  |    | $0.3 \pm 0.1$ |    | $5 \pm 0$      |
| 82 | CG8804  | Ppap2a        |  |   | $1 \pm 0.4$   |   | $4.7 \pm 0.24$ |
| 83 | CG11576 | 2310046K01Rik |  |  | $0.5 \pm 0.3$ |  | $5 \pm 0$      |

|    |         |        |  |                                                                                   |             |                                                                                    |           |
|----|---------|--------|--|-----------------------------------------------------------------------------------|-------------|------------------------------------------------------------------------------------|-----------|
| 84 | CG16868 | Cachd1 |  |  | $1 \pm 0.4$ |  | $5 \pm 0$ |
|    |         |        |  |                                                                                   |             |                                                                                    |           |
